# Supplementary material for: Graphene quantum dots in photodynamic therapy
Source: Royal Society of Chemistry journal article supplement (doi:10.1039/d0na00631a), 2020-01-01
Supplement: d0na00631a1.pdf [file d0na00631a1.pdf]

Supporting Information

# Graphene Quantum Dots in Photodynamic Therapy

Jiayi Chen<sup>1</sup>, Wentian Wu<sup>2</sup>, Fangwei Zhang<sup>2</sup>, Jiali Zhang<sup>2</sup>, Hui Liu<sup>1</sup>, Jing Zheng<sup>1\*</sup>, Shouwu Guo<sup>2\*</sup> and Jingyan Zhang<sup>1</sup>

<sup>1</sup> State Key Laboratory of Bioreactor Engineering, Shanghai Key Laboratory of New Drug Design, School of Pharmacy, East China University of Science and Technology, Shanghai, 200237, P.R. China

<sup>2</sup> Department of Electronic Engineering, School of Electronic Information and Electrical Engineering, Shanghai Jiao Tong University, Shanghai 200240, P.R. China

\* Correspondence: [zhengjing@ecust.edu.cn](mailto:zhengjing@ecust.edu.cn), and [swguo@sjtu.edu.cn](mailto:swguo@sjtu.edu.cn)

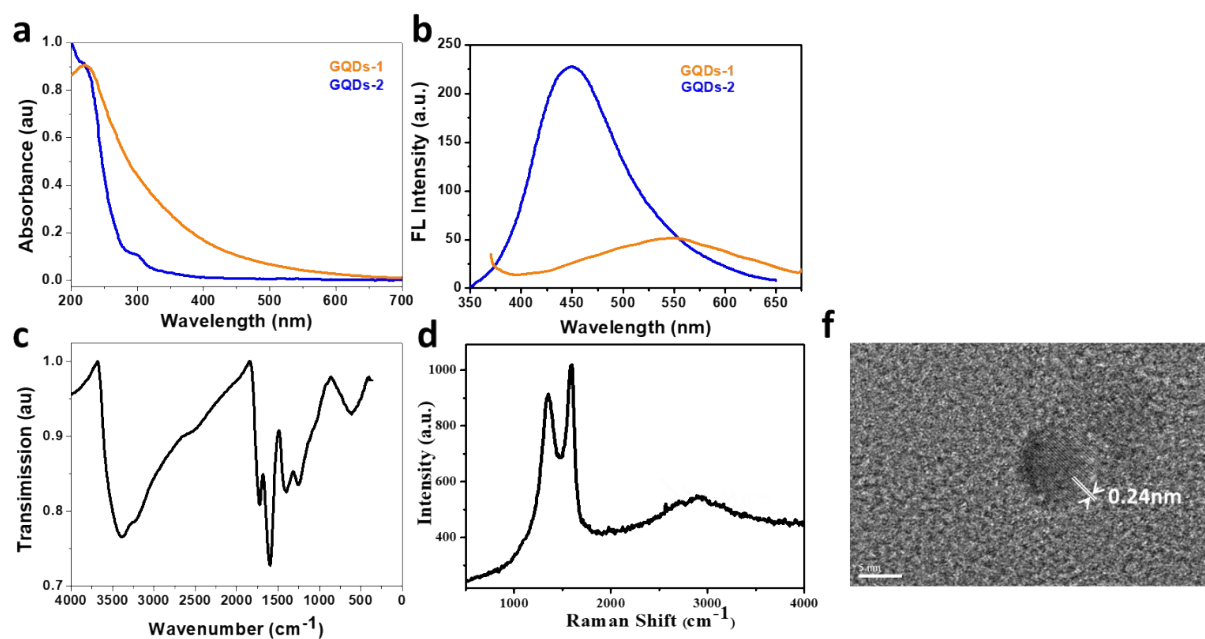

**Figure S1.** UV-vis (a), fluorescence (b), FT-IR (c), and Raman spectra (d) of the GQDs-1 and GQDs-2. e) high-resolution TEM image of the GQDs-1.

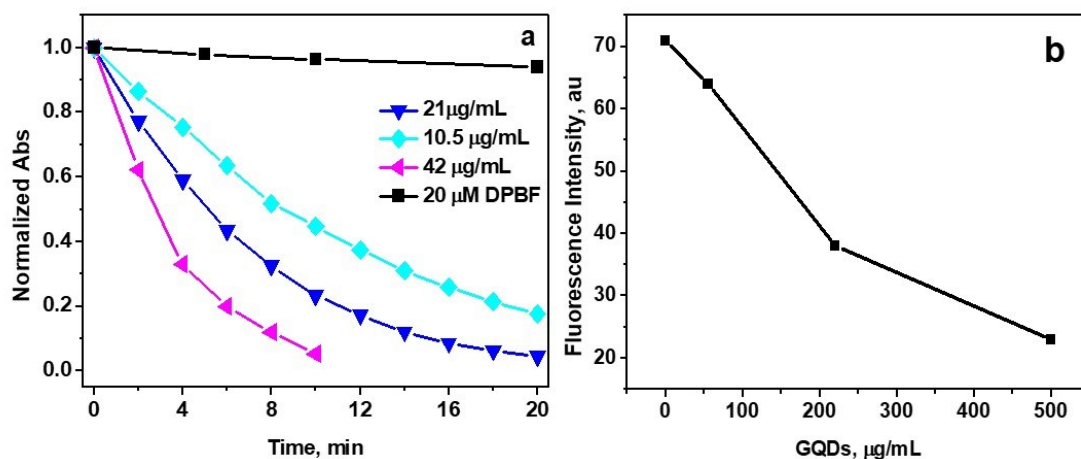

**Figure S2.** Comparison of the  $^1\text{O}_2$  detection methods. a) DPBF method. Absorbances of the different concentrations of GQDs-1 with 20  $\mu\text{M}$  DPBF solutions (DMF/ $\text{H}_2\text{O}$ , v/v=1) under irradiation of the halogen lamp with a 550 nm cutoff filter. b) SOSG method. Fluorescence intensities of the SOSG solution with different GQDs-1 after 10 min of the irradiation. Excitation 488 nm.

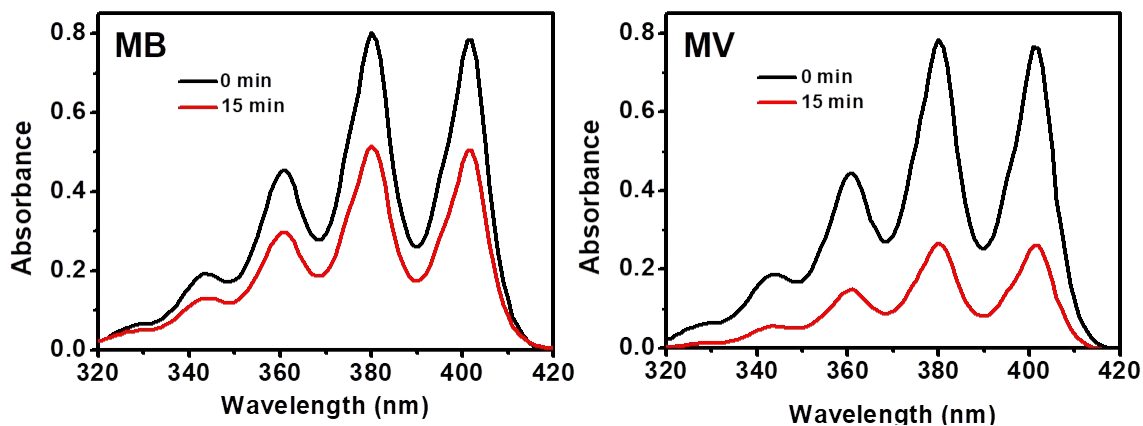

**Figure S3.** ADMA absorption changes in the presence of photosensitizers MB and MV under irradiation of a 660 nm laser for 15 min. MB was 0.5  $\mu\text{M}$ , and MV was 2  $\mu\text{M}$ .

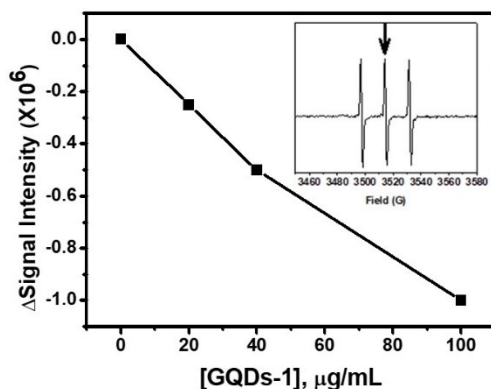

**Figure S4.** The change of EPR signal intensity of samples of the MB (0.1 mM)/TEMP in the presence of different concentrations of the GQDs-1. The samples were measured after the irradiation with a 660 nm laser for 15 min. Insert is the EPR spectrum of the starting sample, and arrow indicates the peak that intensity is measured.

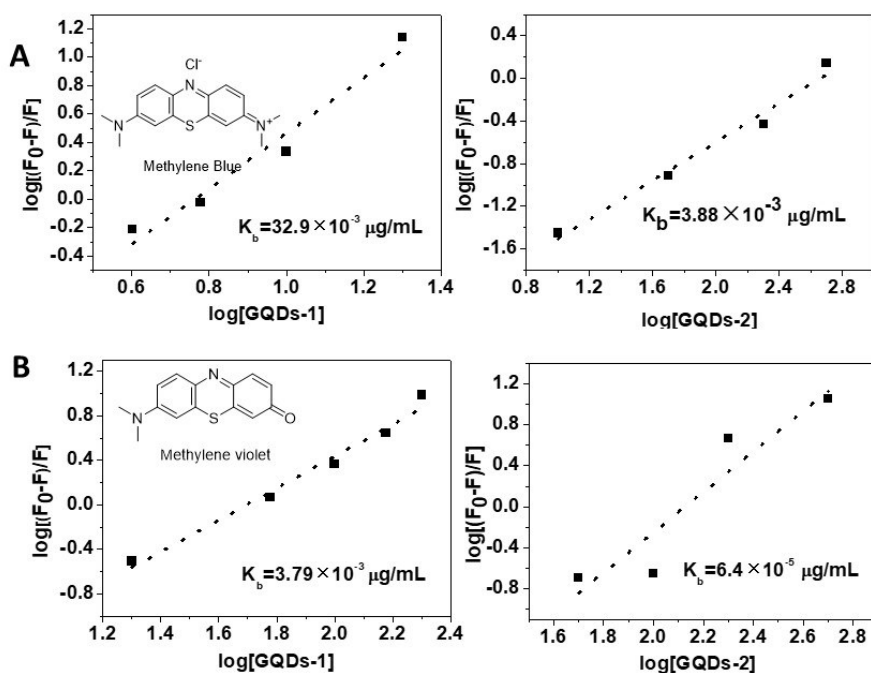

**Figure S5.** The change of fluorescence intensity of MB (A) and MV (B) with different concentrations of GQDs-1 and GQDs-2 in 10 mM PBS buffer (pH 7.4). The excitation wavelength was 650 nm (A) and 610 nm (B), respectively.

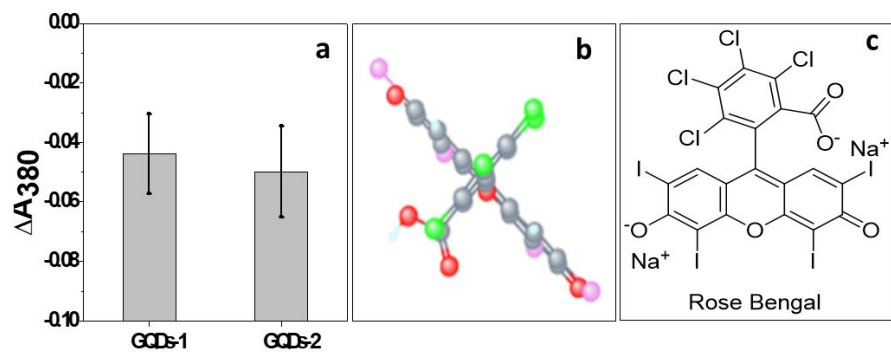

**Figure S6.** (a) Photoactivity change of rose bengal (2  $\mu\text{M}$ ) in the presence of GQDs-1 and GQDs-2 (50  $\mu\text{g/mL}$ ) under the irradiation of halogen light for 15 min. (b-c) Three dimensional and chemical structure of rose Bengal.
